# Supplementary material for: Magnaporthe oryzae Effector AvrPik-D Targets Rice Rubisco Small Subunit OsRBCS4 to Suppress Immunity
Source: MDPI journal article supplement (doi:10.3390/plants13091214), 2024-04-27
Supplement: s1 [file s1]

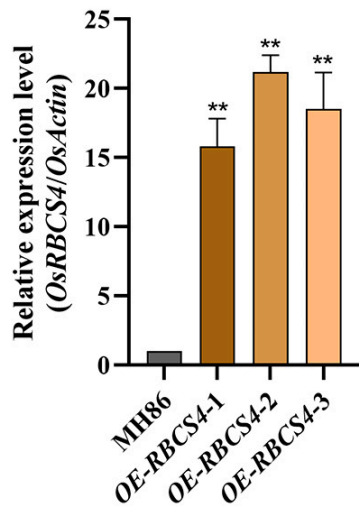

**Figure S1** Overexpression of OsRBCS4 in rice validated by qRT-PCR. (A) Expression levels of the OsRBCS4 gene in three overexpression lines were measured by quantitative real-time polymerase chain reaction (qRT-PCR). Each bar represents the mean standard deviation (SD) (n = 3). Asterisks indicate significant differences analyzed by Student's t-test (\*P < 0.05, \*\*P < 0.01, \*\*\*P < 0.0001).

### Supplemental Table 1

List of primers used in the study.

| Primer                | Sequence (5'--3')                             | Described                |
|-----------------------|-----------------------------------------------|--------------------------|
| Cluc-OsRBCS4-KpnI-F   | tacgcgtcccggggcgtaccATGGCTCCCTCGGTGATGG       | For LUI assay            |
| Cluc-OsRBCS4-SalI-R   | acgaaagctctgcaggtcgacTTAGTTGCCGCTGACTCCTC     |                          |
| pMAL-OsRBCS4-EcoRI-F  | gagggaaggatttcagaattcATGGCTCCCTCGGTGATGG      | For Pull-down assay      |
| pMAL-OsRBCS4-XbaI-R   | tgctgcaggtcgactctagaTTAGTTGCCGCTGACTCCTC      |                          |
| PVX-OsRBCS4-HA-ClaI-F | tcagcaccagctagcatcgatATGGCTCCCTCGGTGATGG      | For Co-IP assay          |
| PVX-OsRBCS4-HA-SmaI-R | aatctctagaggatccccgggGTTGCCGCTGACTCCTCG       |                          |
| AvrPikD-GFP-Tob-F     | aacgatactcgaggggatccATGGAAACGGGCAACAAATATATA  |                          |
| AvrPikD-GFP-Tob-R     | gggaaattcgtagtgatccTCAAAGATCTACCATGTACAGCTCG  |                          |
| RFP-AvrPik-D-F        | aagggatccccgggtgagctcATGGAAACGGGCAACAAATATATA | For transient expression |
| RFP-AvrPik-D-R        | agcgccgcactagtaagcttTAAAAGCCGGGCCTTTTTT       |                          |

|                        |                                                   |                                                       |
|------------------------|---------------------------------------------------|-------------------------------------------------------|
| 223-OsRBCS4-SacIF      | gtgggatccccgggtgagctcATGGCTCCCTCGGTGATGG          | of rice protoplasts assay                             |
| 223-OsRBCS4-NotIR      | cccttgctcaccatagcgccgcGTTGCCGCCTGACTCCTCG         |                                                       |
| OE-RBCS4-F             | CGggatccATGGCTCCCTCGGTGATGG                       | OsRBCS4 overexpression<br>in transgenic rice          |
| OE-RBCS4-R             | GGgtaccTTAGTTGCCGCCTGACTCC                        |                                                       |
| BD- <i>AvrPik-D</i> -F | tcagaggaggacctgcatatgATGGAAACGGGCAACAAATAT<br>ATA | Construct vector for Y2H<br>assay                     |
| BD- <i>AvrPik-D</i> -R | gcaggtcgacggatccccgggTAAAAGCCGGGCCTTTTTT          |                                                       |
| AD-RBCS4-F             | gtaccagattacgctcatatgATGGCTCCCTCGGTGATGG          |                                                       |
| AD-RBCS4-R             | ccgtatcgatgccacccgggTTAGTTGCCGCCTGACTCCTC         |                                                       |
| OsUG_F                 | TTCTGGTCCTTCCACTTTCAG                             | qRT-PCR of rice<br>genomic ubiquitin                  |
| OsUG_R                 | ACGATTGATTTAACCAGTCCATGA                          |                                                       |
| MoPot2-F               | ACGACCCGTCTTTACTTATTTGG                           | qRT-PCR of<br><i>M.oryzae</i> retrotransposon<br>Pot2 |
| MoPot2-R               | AAGTAGCGTTGTTTTGTTGGAT                            |                                                       |
| QRT-OsRbcS4 F1         | GCAATGGCGGAAGGATCAGA                              | qRT-PCR                                               |
| QRT-OsRbcS4 R1         | GGAGCGCGAGAGAAACAATTACG                           | qRT-PCR                                               |
| OsACTIN1-QRT-F         | TGTATGCCAGTGGTCGTACCA                             | qRT-PCR                                               |
| OsACTIN1-QRT-R         | CCAGCAAGGTCGAGACGAA                               | qRT-PCR                                               |
| OsPBZ1-QF              | GGTGTGGGAAGCACATAC                                | qRT-PCR                                               |
| OsPBZ1-QR              | GTCTCCGTCGAGTGTGACTTG                             | qRT-PCR                                               |
| OsPR1b-QF              | CCCCTCCCAAGCTCAAACTCC                             | qRT-PCR                                               |
| OsPR1b-QR              | TGCCCCGACACCTTCCCC                                | qRT-PCR                                               |
| OsPAL6-QF              | GCTCTTCCGCACACACAACCTC                            | RT-PCR                                                |
| OsPAL6-QR              | TTGCTCGAGCGGTTTGC                                 | RT-PCR                                                |
